# Supplementary material for: Dual responsive PMEEECL–PAE block copolymers: a computational self-assembly and doxorubicin uptake study
Source: PubMed Central journal article supplement — RSC Adv. 2020 Jan 20;10(6):3233–45. doi: 10.1039/c9ra09066e (PMC9048636; doi:10.1039/c9ra09066e), 2020-01-20
Supplement: RA-010-C9RA09066E-s001.pdf [file RA-010-C9RA09066E-s001.pdf]

## Supplementary information for

### **Dual responsive PMEEECL-PAE block copolymers: a computational self-assembly and doxorubicin uptake study**

**Amin Koochaki<sup>a,b</sup>, Mohammad Reza Moghbeli<sup>\*a</sup>, Sousa Javan Nikkhah<sup>a</sup>,  
Alessandro Ianiro<sup>b,c</sup>, Remco Tuinier<sup>\*b,c</sup>**

<sup>a</sup> Smart Polymers and Nanocomposites Research Group, School of Chemical Engineering, Iran University of Science and Technology, Tehran 16846–13114, Iran

<sup>b</sup> Laboratory of Physical Chemistry, Department of Chemical Engineering and Chemistry, Eindhoven University of Technology, P.O. Box 513, 5600 MB Eindhoven, The Netherlands

<sup>c</sup> Institute for Complex Molecular Systems, Eindhoven University of Technology, P.O. Box 513, 5600 MB Eindhoven, The Netherlands

---

**\* Correspondence to: M. R. Moghbeli (mr\_moghbeli@iust.ac.ir)**

**\* Correspondence to: R. Tuinier (r.tuinier@tue.nl)**

Table S1: Details of simulation systems for all-atom (AA) and coarse-grained (CG) simulations.

| System                                                   | AA/CG | Production time<br>(ns) | Simulation box<br>size (nm <sup>3</sup> ) | Temperature (K)                                             |
|----------------------------------------------------------|-------|-------------------------|-------------------------------------------|-------------------------------------------------------------|
| PMEEECL <sub>20</sub> -PAE <sub>5</sub> in<br>water box  | AA    | 50                      | 245                                       | 285, 290, 295, 300,<br>305, 310, 315, 320,<br>325, 330, 335 |
| PMEEECL <sub>20</sub> -PAE <sub>10</sub> in<br>water box | AA    | 50                      | 310                                       | 285, 290, 295, 300,<br>305, 310, 315, 320,<br>325, 330, 335 |
| PMEEECL <sub>20</sub> -PAE <sub>15</sub> in<br>water box | AA    | 50                      | 382                                       | 285, 290, 295, 300,<br>305, 310, 315, 320,<br>325, 330, 335 |
| PMEEECL <sub>2</sub> -PAE <sub>2</sub> in<br>water box   | AA    | 10                      | 90                                        | 300                                                         |
| PMEEECL <sub>2</sub> -PAE <sub>2</sub> in<br>water box   | CG    | 300                     | 12350                                     | 300                                                         |
| PMEEECL <sub>20</sub> -PAE <sub>5</sub> in<br>water box  | CG    | 600                     | 32768                                     | 300, 305, 310, 315,<br>320, 325, 330                        |
| PMEEECL <sub>20</sub> -PAE <sub>10</sub> in<br>water box | CG    | 600                     | 33076                                     | 300                                                         |
| PMEEECL <sub>20</sub> -PAE <sub>15</sub> in<br>water box | CG    | 600                     | 33560                                     | 300                                                         |
| DOX in water Box                                         | AA    | 10                      | 60                                        | 300                                                         |
| DOX in water Box                                         | CG    | 300                     | 11148                                     | 300                                                         |
| DOX 1wt% of                                              | CG    | 640                     | 31300                                     | 300                                                         |
| PMEEECL <sub>20</sub> -PAE <sub>5</sub> in<br>water box  |       |                         |                                           |                                                             |
| DOX 5wt% of                                              | CG    | 640                     | 31357                                     | 300                                                         |
| PMEEECL <sub>20</sub> -PAE <sub>5</sub> in<br>water box  |       |                         |                                           |                                                             |
| DOX 10wt% of                                             | CG    | 640                     | 31381                                     | 300                                                         |
| PMEEECL <sub>20</sub> -PAE <sub>5</sub> in<br>water box  |       |                         |                                           |                                                             |

Table S2. Flory-Huggins interaction parameters  $\chi_{ij}$  used in the SCF computations.

| <i>i</i> | <i>j</i> | $\chi_{ij}$ | <i>i</i> | <i>j</i> | $\chi_{ij}$ |
|----------|----------|-------------|----------|----------|-------------|
| W        | A        | 0.51        | A        | $I^+$    | 0           |
| W        | B        | 1.8         | B        | C        | 0.5         |
| W        | C        | 3.5         | B        | $I^-$    | 0           |
| W        | $I^-$    | 0           | B        | $I^+$    | 0           |
| W        | $I^+$    | 0           | C        | $I^-$    | 0           |
| A        | B        | 0.4         | C        | $I^+$    | 0           |
| A        | C        | 0.8         | $I^+$    | $I^-$    | 0           |
| A        | $I^-$    | 0           |          |          |             |

Table S3: All-atom MD simulations results for the radius of gyration ( $R_g$ ) for both the hydrophilic (PMEEECL) and hydrophobic (PAE) parts of PMEEECL<sub>20</sub>-PAE<sub>M</sub> block copolymer with  $M = 5, 10,$  and  $15$  for various temperatures from 285 K to 335 K.

| $R_g$ (Å) |                         |            |                         |            |                         |            |
|-----------|-------------------------|------------|-------------------------|------------|-------------------------|------------|
| T (K)     | PMEEECL <sub>20</sub> - |            | PMEEECL <sub>20</sub> - |            | PMEEECL <sub>20</sub> - |            |
|           | PAE <sub>5</sub>        |            | PAE <sub>10</sub>       |            | PAE <sub>15</sub>       |            |
|           | PMEEECL                 | PAE        | PMEEECL                 | PAE        | PMEEECL                 | PAE        |
| 285       | 24.2 ± 0.6              | 19.3 ± 0.6 | 24.4 ± 0.2              | 32.1 ± 0.5 | 26.2 ± 0.2              | 40 ± 0.6   |
| 290       | 21.9 ± 0.9              | 18.6 ± 0.6 | 22.8 ± 0.5              | 37 ± 0.4   | 25.6 ± 0.5              | 45.4 ± 0.9 |
| 295       | 20.2 ± 0.4              | 17.7 ± 0.8 | 24.9 ± 0.3              | 30 ± 0.5   | 27.2 ± 0.4              | 34.5 ± 0.6 |
| 300       | 22 ± 1                  | 17 ± 1     | 23.8 ± 0.6              | 34.2 ± 0.7 | 21.3 ± 0.5              | 45.3 ± 0.5 |
| 305       | 24.4 ± 0.3              | 16.4 ± 0.5 | 16.2 ± 0.3              | 38.5 ± 0.4 | 19.7 ± 0.6              | 47.2 ± 0.3 |
| 310       | 22.2 ± 0.3              | 18.8 ± 0.2 | 17.4 ± 0.4              | 34.2 ± 0.6 | 19 ± 0.2                | 44.5 ± 0.4 |
| 315       | 16.2 ± 0.3              | 15.1 ± 0.5 | 17.1 ± 0.5              | 34 ± 2     | 22.4 ± 0.3              | 38.9 ± 0.6 |
| 320       | 15 ± 1                  | 19 ± 1     | 19.8 ± 0.2              | 29.6 ± 0.3 | 19.5 ± 0.3              | 52 ± 0.9   |
| 325       | 17 ± 2                  | 17.3 ± 0.3 | 17.9 ± 0.6              | 36.4 ± 0.3 | 20 ± 0.4                | 38.1 ± 0.5 |
| 330       | 15.1 ± 0.3              | 16.5 ± 0.6 | 16.1 ± 0.4              | 38.4 ± 0.5 | 20.7 ± 0.5              | 41.7 ± 0.4 |
| 335       | 17.3 ± 0.4              | 19.1 ± 0.3 | 17.3 ± 0.5              | 36.2 ± 0.8 | 20.2 ± 0.4              | 43.4 ± 0.5 |

Table S4: Estimated coil-to-globule transition temperature ( $T_{cg}$ ) of PMEEECL in PMEEECL<sub>20</sub>-PAE<sub>M</sub> block copolymers with  $M = 0, 5, 10,$  and  $15$  as a function of hydrophilic mass fraction from fitting equation 1 to simulations data in Fig. 1a and Table S3. For  $M = 0$  the  $T_{cg}$  is excerpted from [24].

| PMEEECL <sub>20</sub> -PAE <sub>M</sub> |                                   |               |
|-----------------------------------------|-----------------------------------|---------------|
| $M$                                     | Hydrophilic mass fraction ( $f$ ) | $T_{cg}$ (K)  |
| 0                                       | 1                                 | $318 \pm 2.5$ |
| 5                                       | 0.697                             | $312 \pm 2.5$ |
| 10                                      | 0.563                             | $302 \pm 2.5$ |
| 15                                      | 0.463                             | $298 \pm 2.5$ |

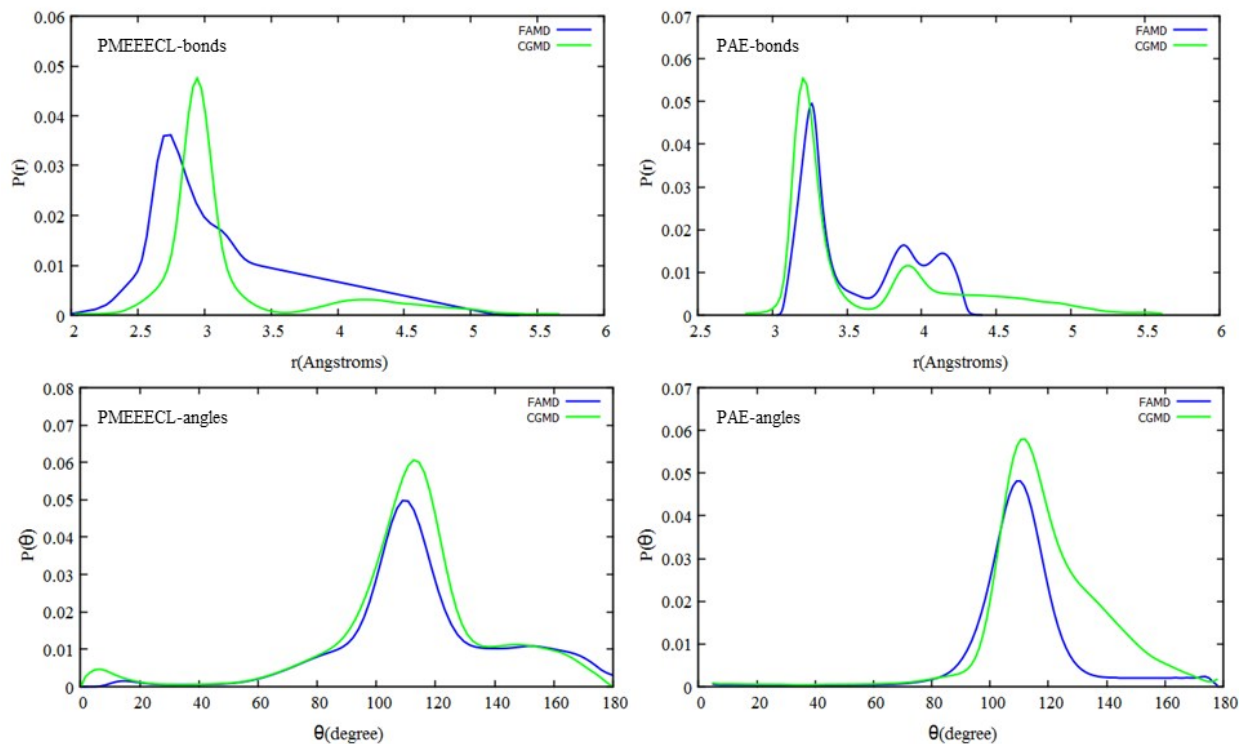

FIG. S1: Bond and angle distributions  $P(r)$  and  $P(\theta)$  of PMEEEECL and PAE for all-atom MD simulations and MARTINI CG force field simulations.

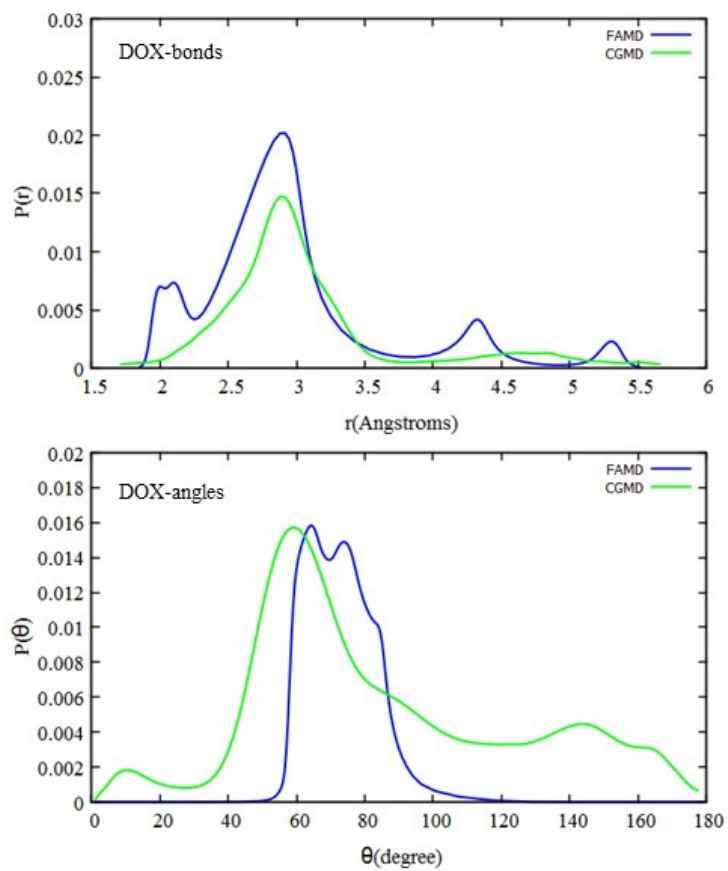

FIG. S2: Bond and angle distributions  $P(r)$  and  $P(\theta)$  of DOX for all-atom MD simulations and MARTINI CG force field simulations.

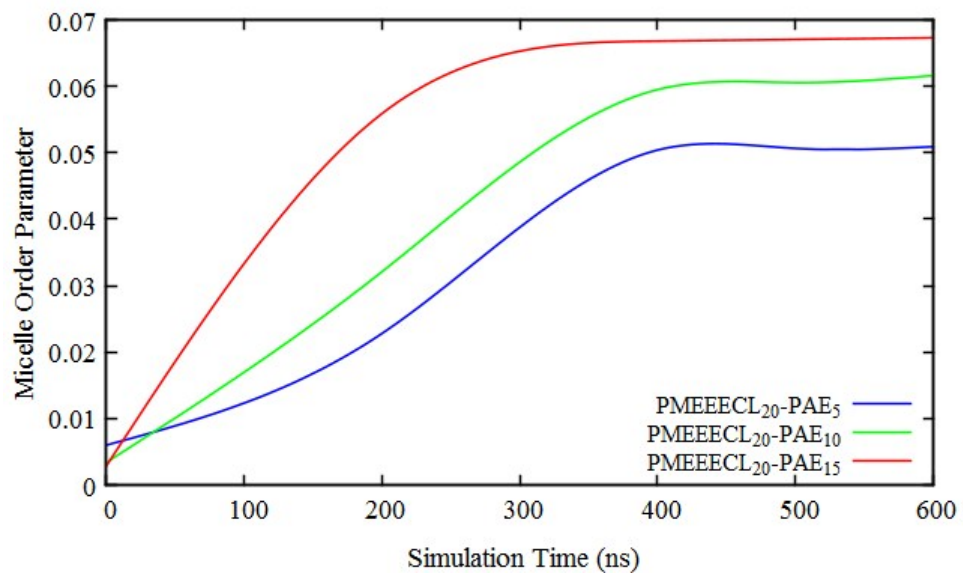

FIG. S3: Micelle order parameter as a function of simulation time.



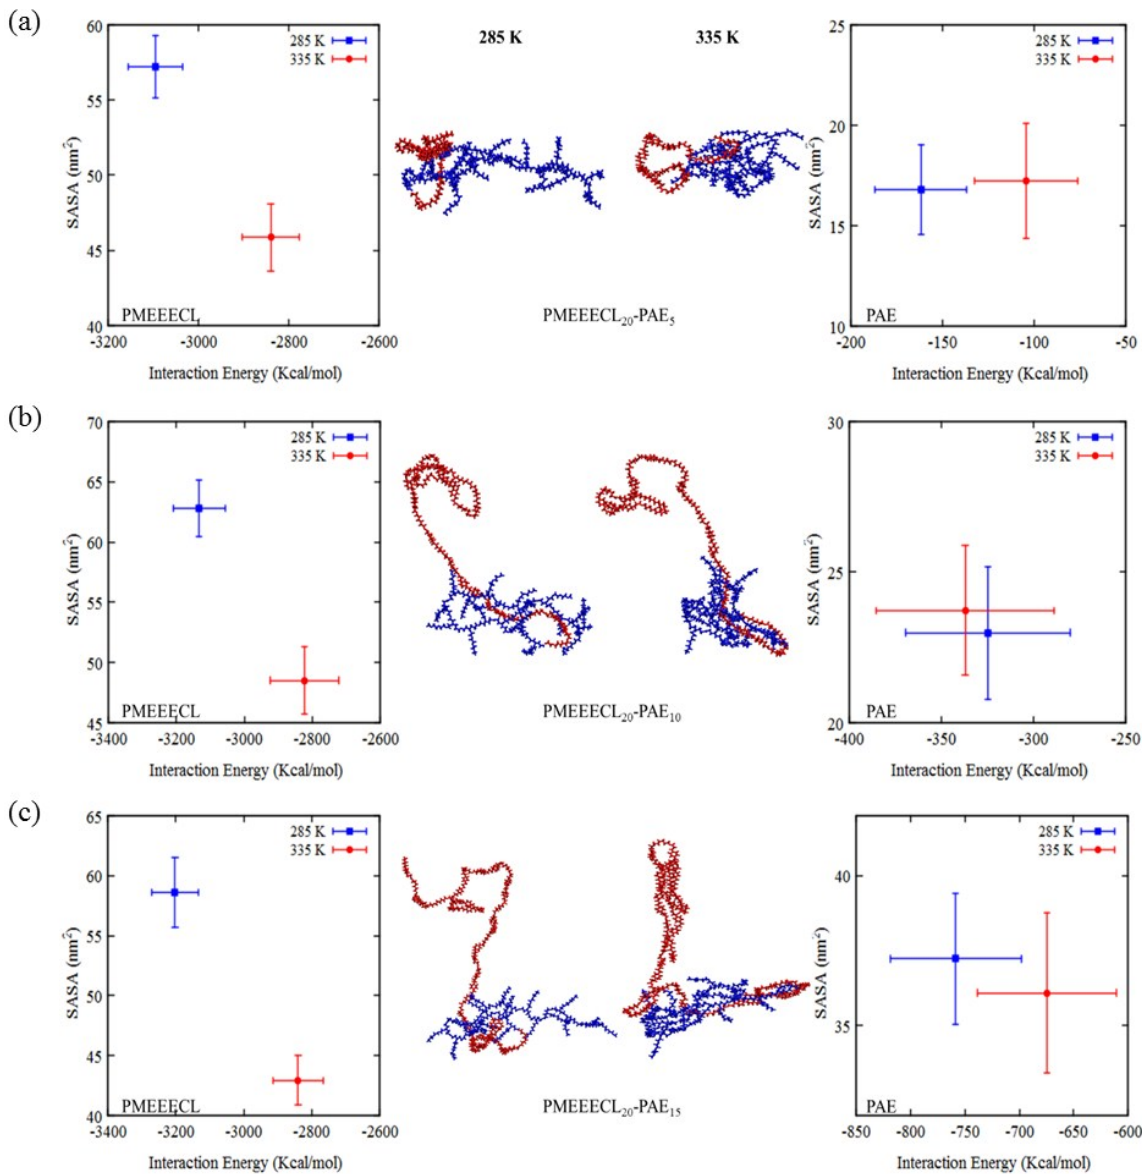

Figure S4: Solvent accessible surface area (SASA) as a function of non-bonded interaction energy of PMEEECL and PAE in addition to PMEEECL-PAE snapshot at 285 K and 335 K for a) PMEEECL<sub>20</sub>-PAE<sub>5</sub>, b) PMEEECL<sub>20</sub>-PAE<sub>10</sub>, and c) PMEEECL<sub>20</sub>-PAE<sub>15</sub>. Blue and red chains in snapshots are the PMEEECL and PAE blocks, respectively.

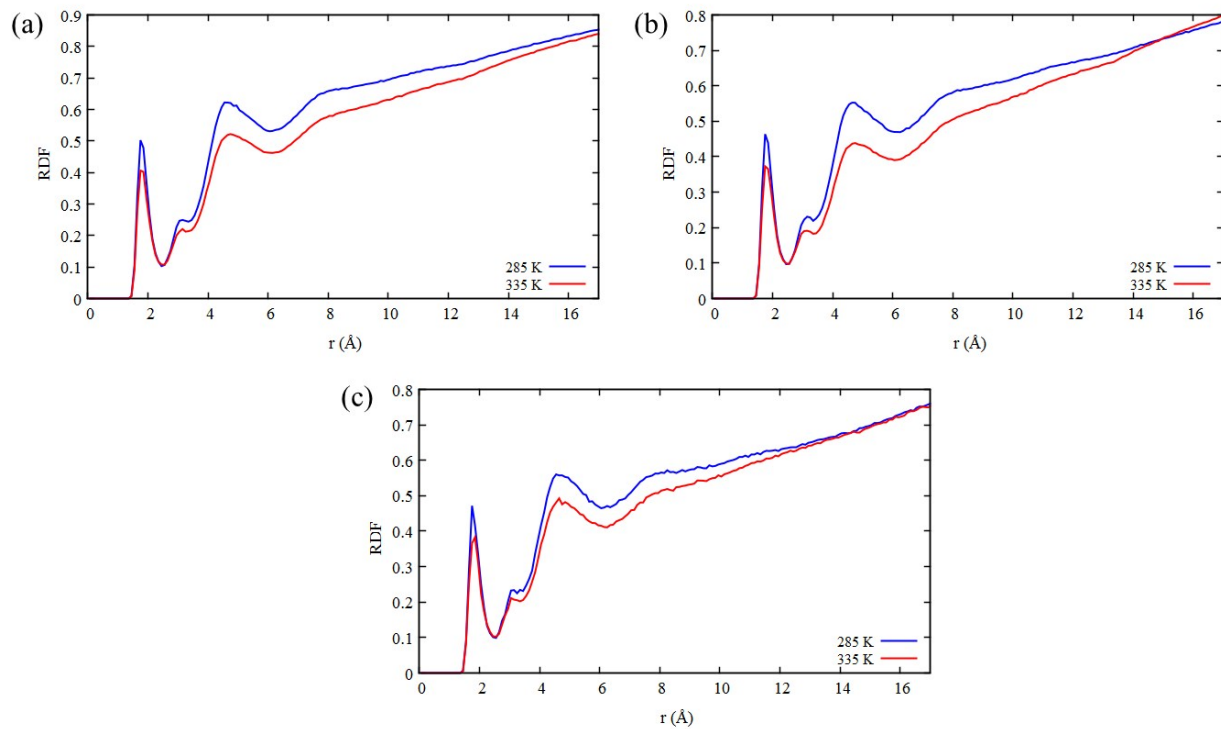

Figure S5: Radial distribution function (RDF) between hydrogen of water molecules and oxygen of PMEEECL at 285 K and 335 K for a) PMEEECL<sub>20</sub>-PAE<sub>5</sub>, b) PMEEECL<sub>20</sub>-PAE<sub>10</sub>, and c) PMEEECL<sub>20</sub>-PAE<sub>15</sub>.

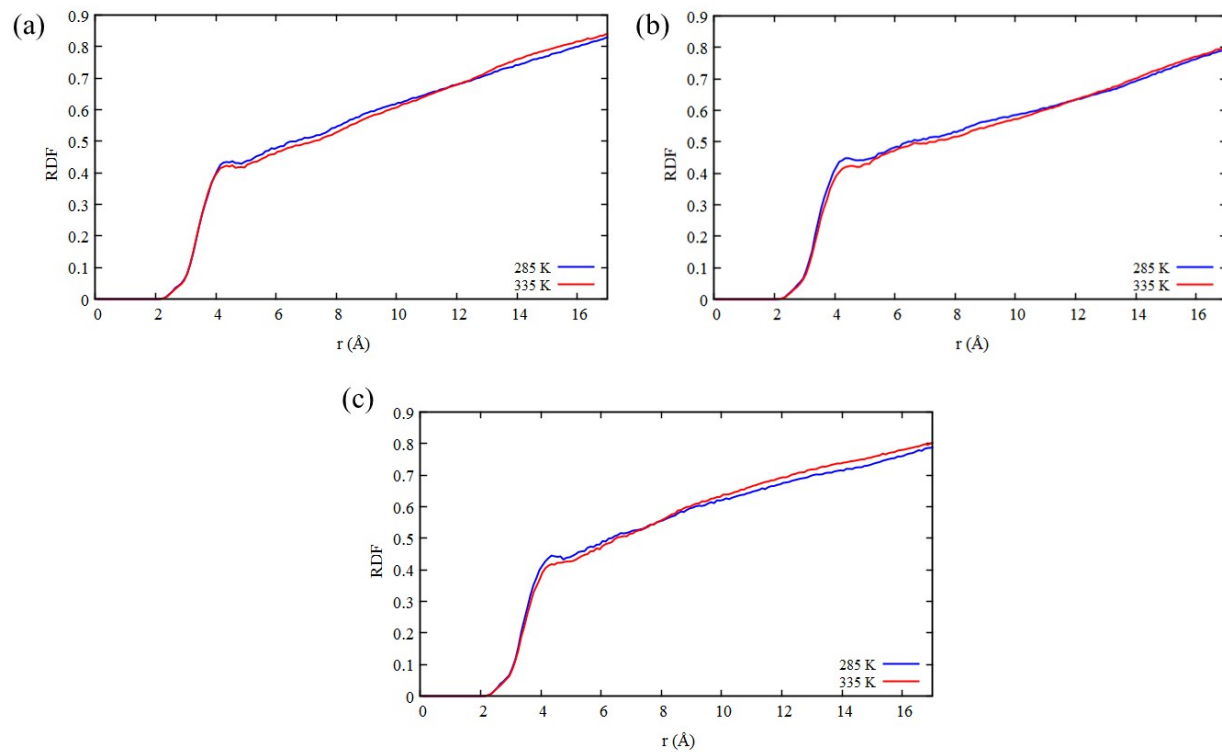

FIG. S6: Radial distribution function (RDF) between PAE monomer and water molecules at 285 K and 335 K.

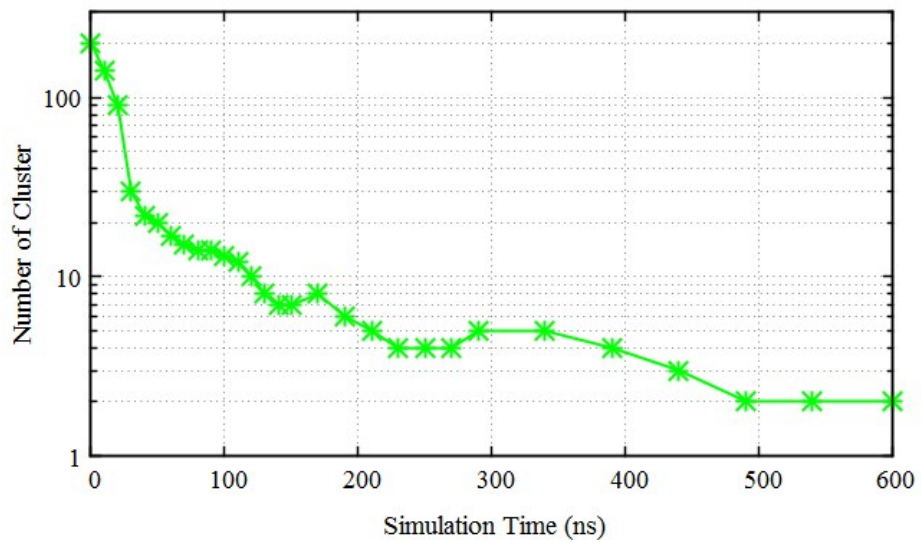

FIG. S7: Number of clusters as a function of simulation time for spherical micelles composed of PMEEECL<sub>20</sub>-PAE<sub>5</sub>.

## Response to temperature by CG simulations

As the PMEEECL beads are the thermoresponsive part of PMEEECL<sub>20</sub>-PAE<sub>5</sub> amphiphilic block copolymer and based on the Fig. 1a there are 4 different types of beads needed to mimic the PMEEECL block and consequently the RDF of these beads and water ones are calculated and plotted in Fig. S8. For all beads of PMEEECL there is an observable reduction for the affinity of them and water beads by increasing temperature and the transition temperature could be observable around 315 K, which is in consistent with all-atom MD simulations for PMEEECL<sub>20</sub>-PAE<sub>5</sub> amphiphilic block copolymer.

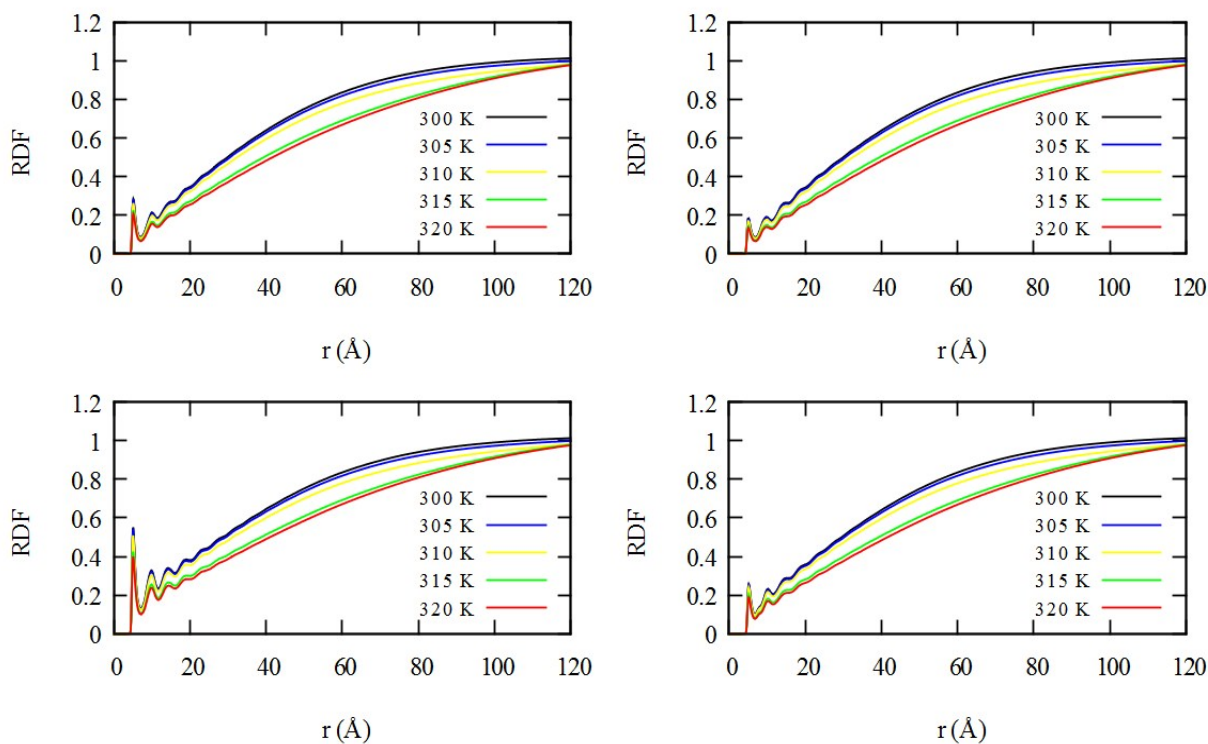

Figure S8: The RDF between the centers of mass of four different beads of PMEEECL block and water beads as a function of temperature.
